# Supplementary material for: Use of General Health Examination and Cancer Screening among People with Disability Who Need Support from Others: Analysis of the 2016 Comprehensive Survey of Living Conditions in Japan
Source: MDPI journal article supplement (doi:10.3390/ijerph21020219), 2024-02-13
Supplement: s1 [file s1]

**Table S2.** The number and percentage of data with missing value among data which met the inclusion criteria of age ( $20 \leq \text{years old} \leq 75$ ) and living place (house). (N=10283; men=4891, women=5302). These data were removed from analysis.

|                                      | Number of data<br>with missing value | (    %    )     |
|--------------------------------------|--------------------------------------|-----------------|
| Outcome variables                    |                                      |                 |
| General health examination           | 90                                   | (    0.88    )  |
| Lung cancer screening                | 303                                  | (    2.95    )  |
| Colorectal cancer screening          | 327                                  | (    3.18    )  |
| Gastric cancer screening             | 280                                  | (    2.72    )  |
| Cervical cancer screening †          | 151                                  | (    2.85    )  |
| Breast cancer screening †            | 137                                  | (    2.58    )  |
| Explanatory variables                |                                      |                 |
| Disability                           | 0                                    | (    0    )     |
| Cofounding variables                 |                                      |                 |
| Sex                                  | 0                                    | (    0    )     |
| Age                                  | 0                                    | (    0    )     |
| Marital status                       | 0                                    | (    0    )     |
| Educational qualification            | 1401                                 | (    13.62    ) |
| Constant visit to hospitals          | 69                                   | (    0.67    )  |
| Subjective health status             | 98                                   | (    0.95    )  |
| Alcohol consumption                  | 152                                  | (    1.48    )  |
| Smoking habit                        | 119                                  | (    1.16    )  |
| Subjective financial state           | 0                                    | (    0    )     |
| Kessler Psychological Distress Scale | 325                                  | (    3.16    )  |
| Health insurance                     | 124                                  | (    1.21    )  |
| Employment status                    | 127                                  | (    1.24    )  |

† Percentages were calculated for only women (n=5302)
